# Supplementary material for: Experimental investigations with neutron radiography of hydrogen effects by elastic stresses on cladding tubes under conditions similar to interim dry storage
Source: Copernicus journal article supplement (doi:10.5194/sand-2-25-2023), 2023-09-06
Supplement: Supplementary file 1 [file sand-2-25-2023-supplement.pdf]

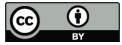

*Supplement of*

**Experimental investigations with neutron radiography of hydrogen effects by elastic stresses on cladding tubes under conditions similar to interim dry storage**

**Sarah Weick et al.**

*Correspondence to:* Sarah Weick ([sarah.weick@kit.edu](mailto:sarah.weick@kit.edu))

The copyright of individual parts of the supplement might differ from the article licence.

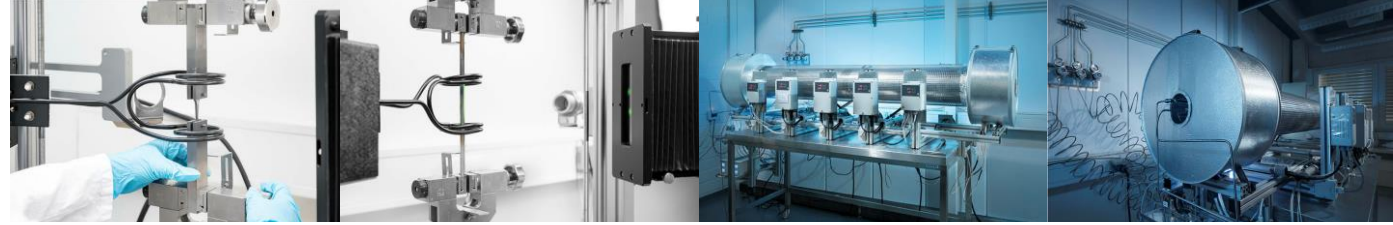

# Experimental investigations with neutron radiography of hydrogen effects by elastic stresses on cladding tubes under conditions similar to interim dry storage

Sarah Weick, Mirco Grosse, Conrado Roessger, Martin Steinbrueck

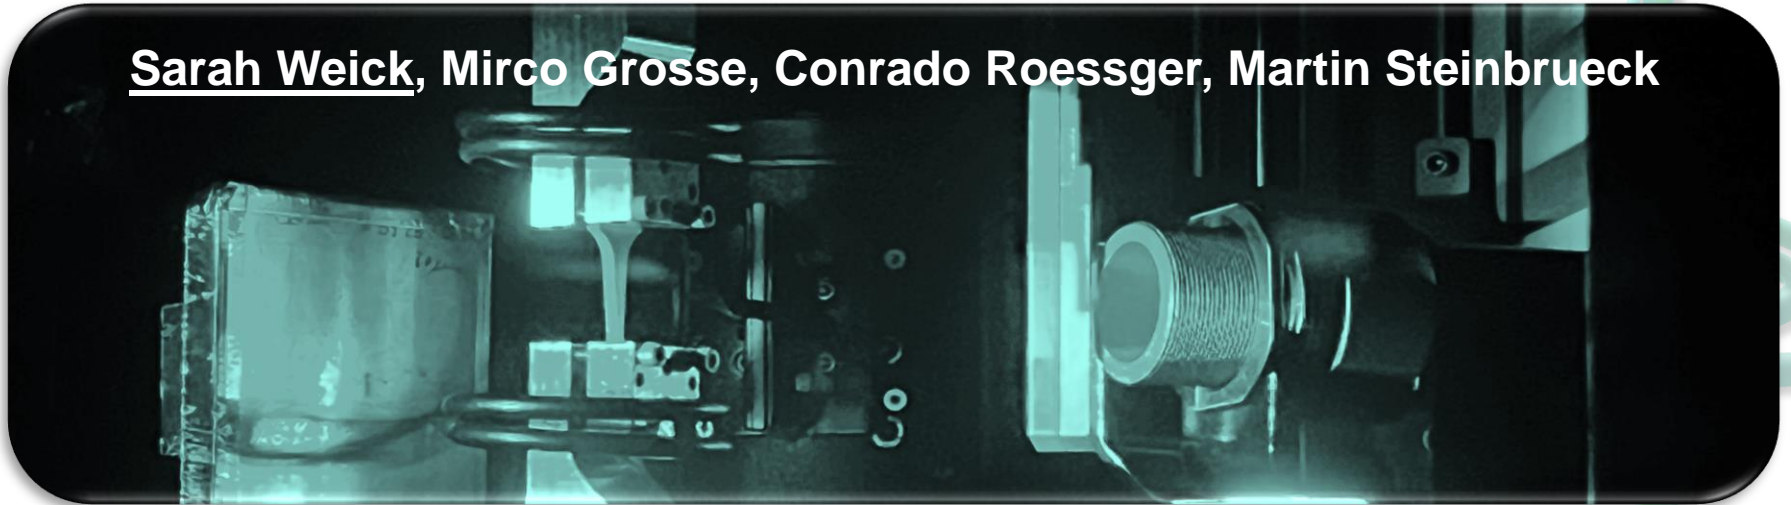

# Experimental investigations with neutron radiography of hydrogen effects by elastic stresses on cladding tubes under conditions similar to interim dry storage

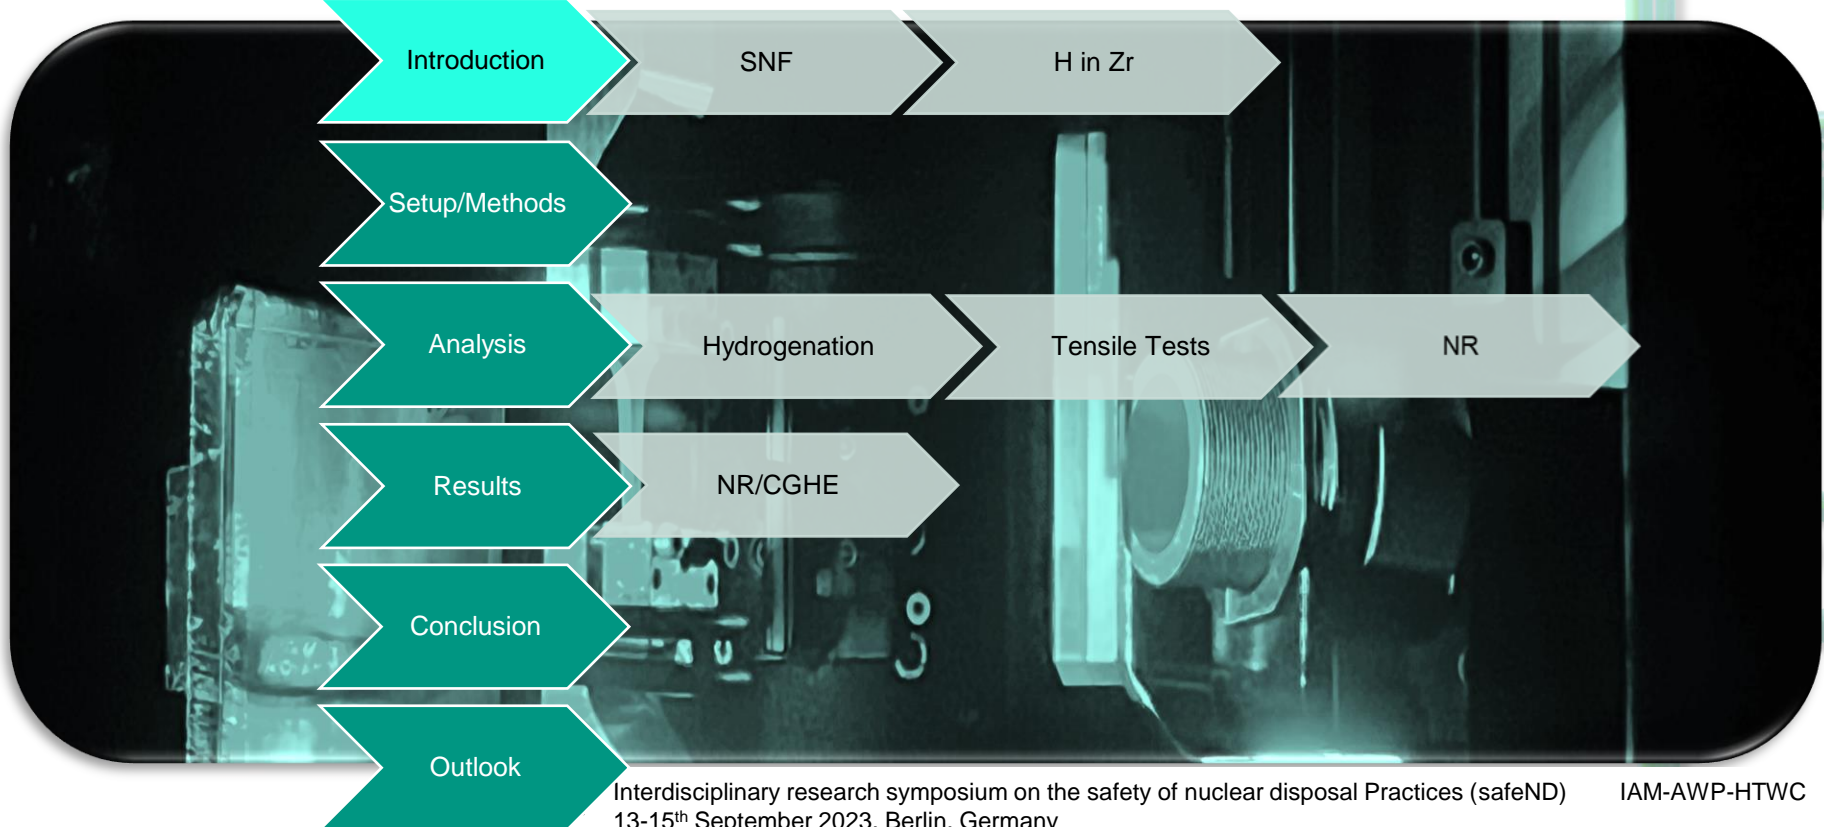

# Introduction – Spent Nuclear Fuel

@ EnBW Kernkraft GmbH

Govers et al., 2019

www.gns.de

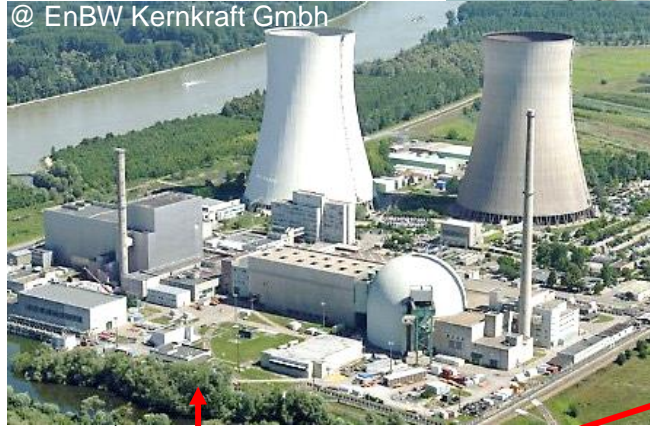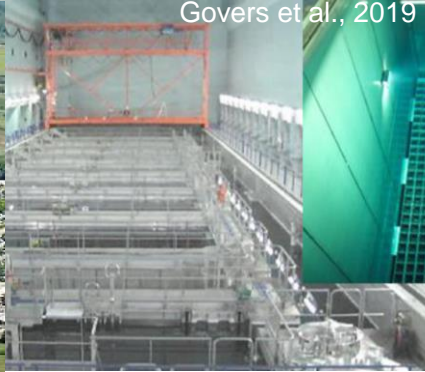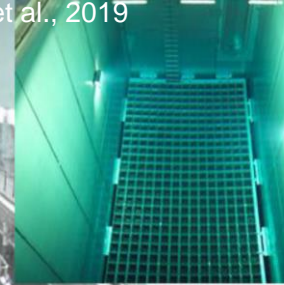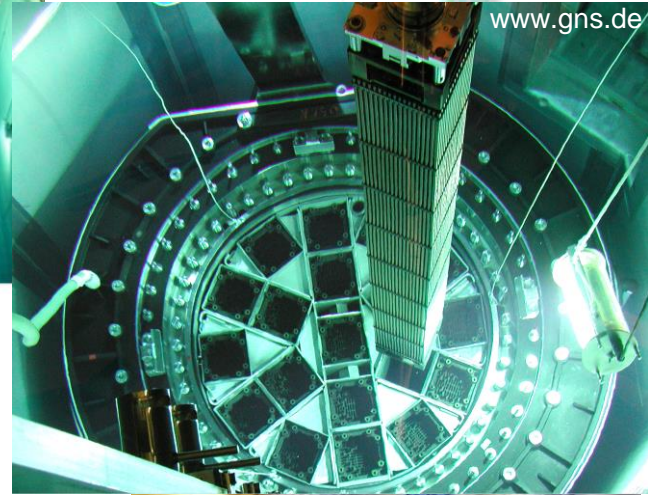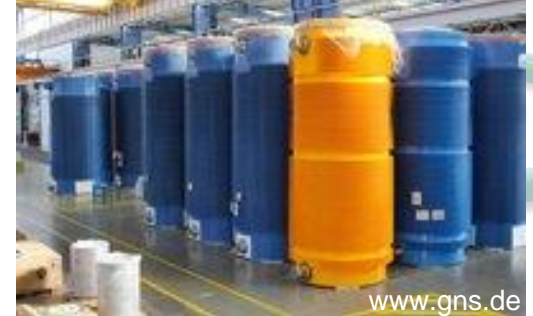

www.gns.de

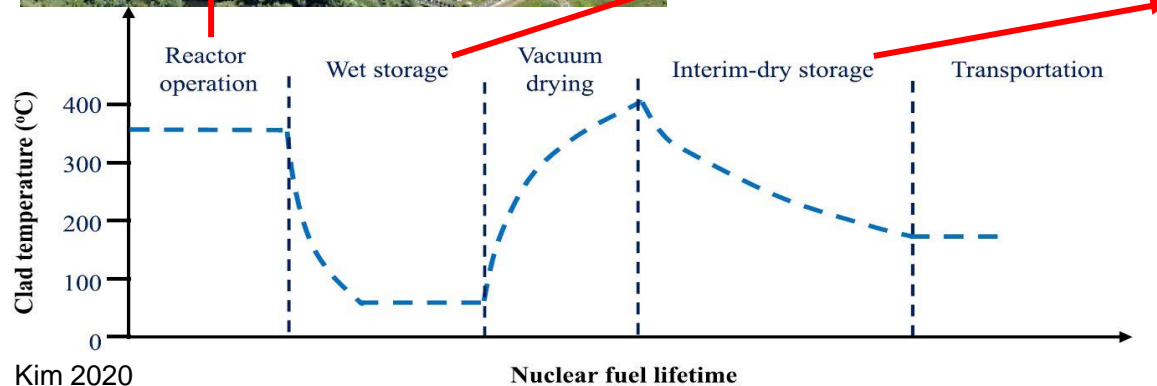



# Introduction – Hydrogen embrittlement

## ■ H in cladding tubes

- H uptake favoured by foreign atoms, alloying elements & textures
- Mechanical strain & chemical activity → influence H diffusion

## ■ Zr Hydrides

- Circumferential or radially orientated
- Reduce strength & ductility
- Delayed hydride cracking (DHC)

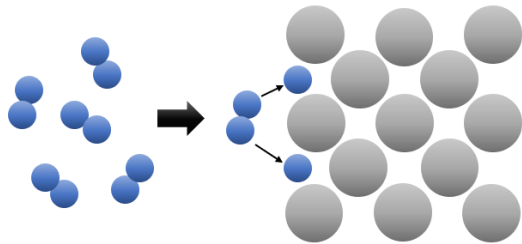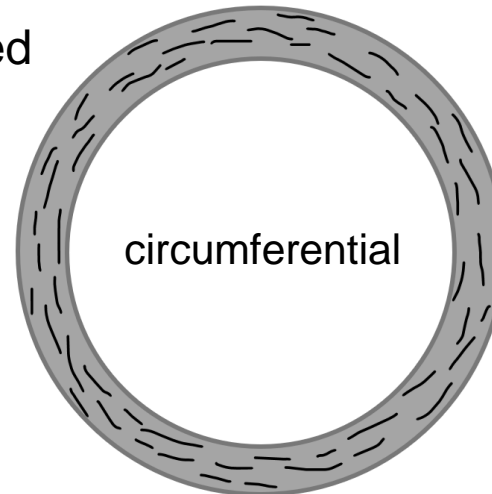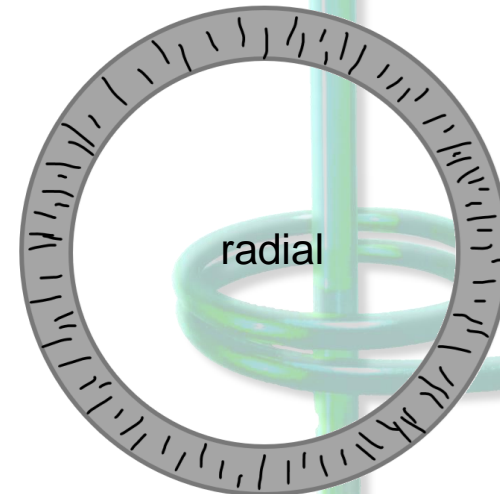

# Introduction – H solubility

- H dissolution-precipitation scheme with modelled **TSS** (terminal solid solubility)

→ **TSSp**: precipitation terminal solubility limit

→ **TSSd**: dissolution terminal solubility limit

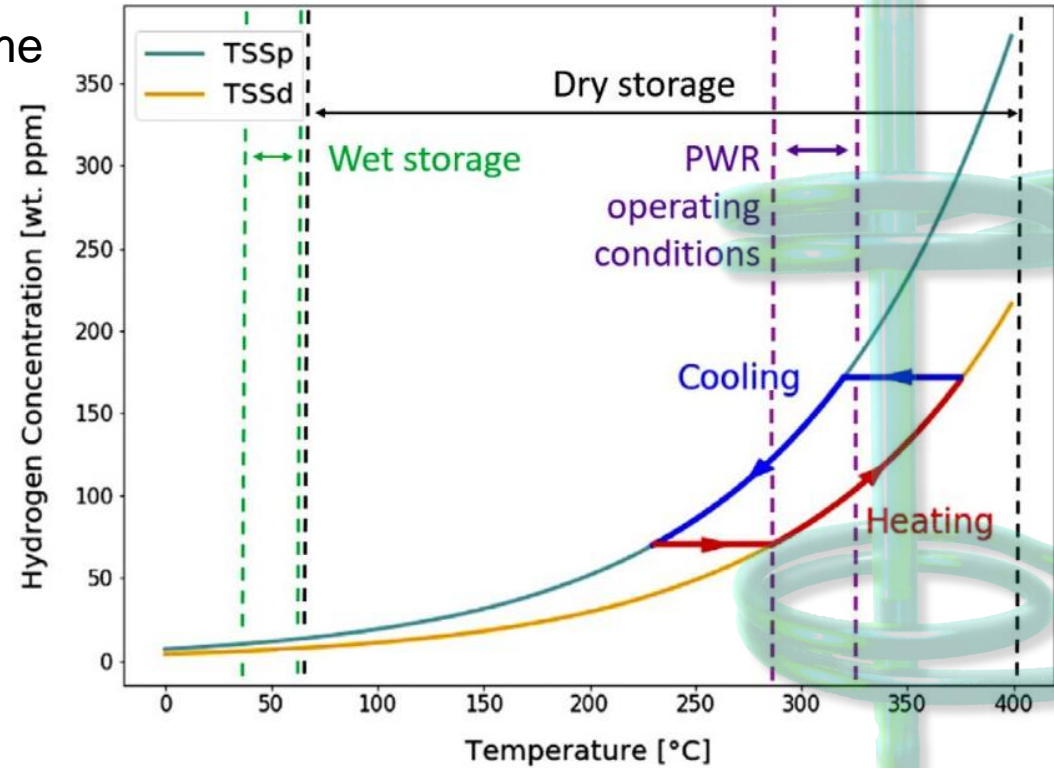

Kaufholz et al.2018, modified from Konarski 2021

# Experimental investigations with neutron radiography of hydrogen effects by elastic stresses on cladding tubes under conditions similar to interim dry storage

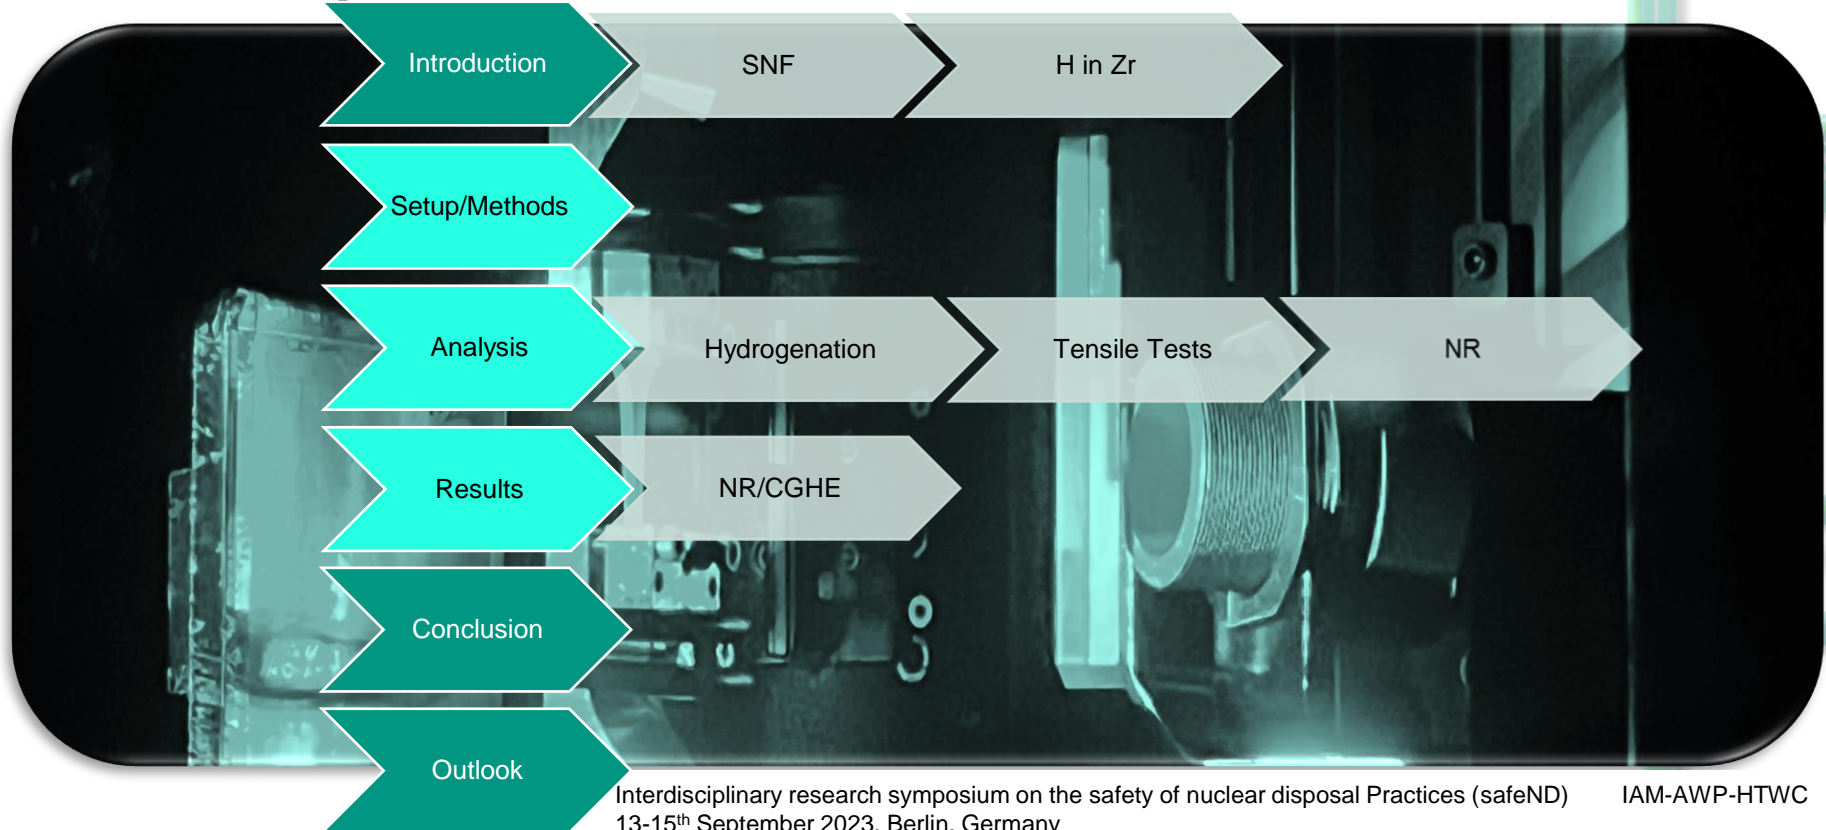

# Experimental Setups

## Single Effect Experiments

- Samples: cm - range
- Influences of texture, grain size & elastic strain
- Diffusion coefficients H

## QUENCH Bundle Test

- Samples: m - range
- Interim storage conditions (100-400°C; 70/96 MPa, 100/300 wt.ppm H)
- Long-term 250 d

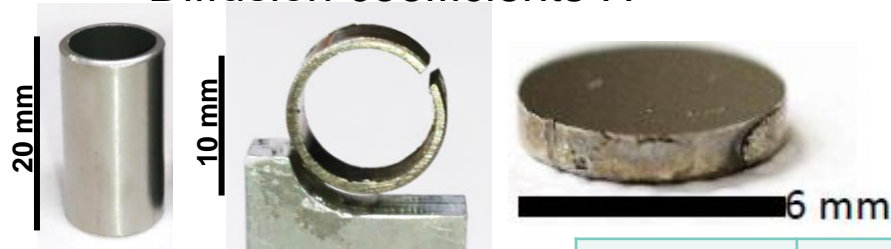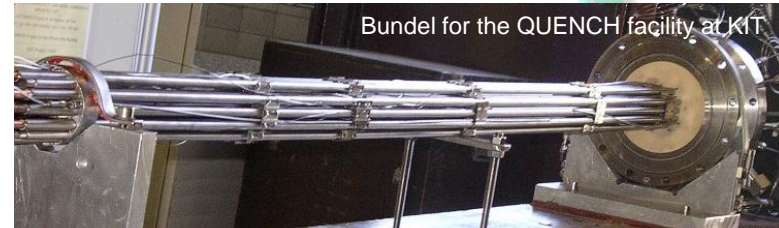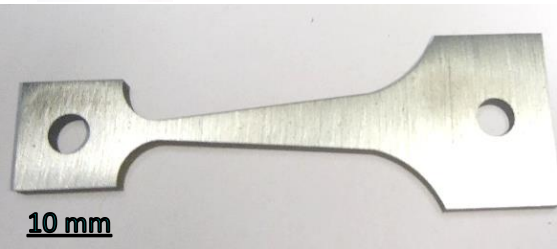

| alloy     | Sn [wt.%] | Fe [wt.%] | Cr [wt.%] | Nb [wt.%] | O [wt.%] |
|-----------|-----------|-----------|-----------|-----------|----------|
| Zry-4, D4 | 1.3       | 0.2       | 0.1       | -         | 0.13     |
| Dx        | 0.5       | 0.5       | 0.2       | -         | 0.14     |
| Zirlo     | 0.9       | 0.1       | -         | 0.9       | -        |



# Methods - Hydrogenation

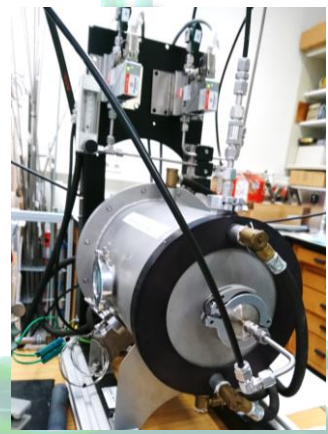

- Annealing from gas phase with SICHA
- **SICHA** = **S**ieverts **C**hamber for Hydrogen **A**bsorption

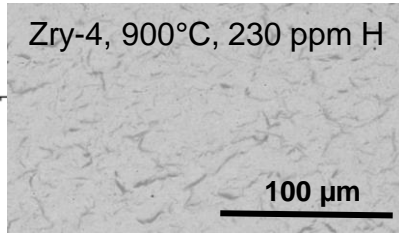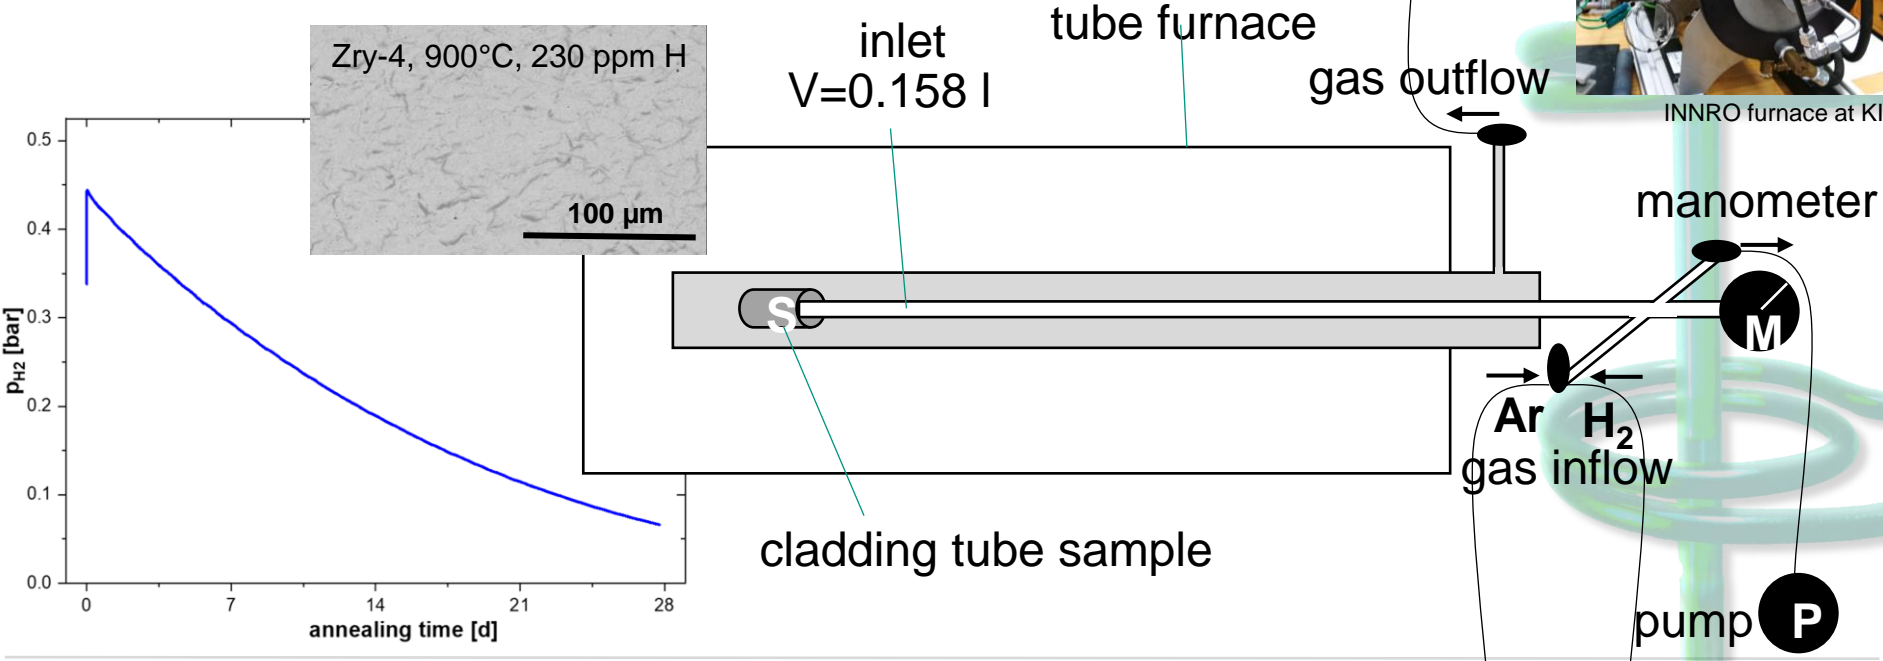

# Methods - Hydrogenation

- 21 hydrided (100 & 300 wt.ppm) fuel rod simulators ( $l = 2.5$  m)

HoKi furnace at KIT

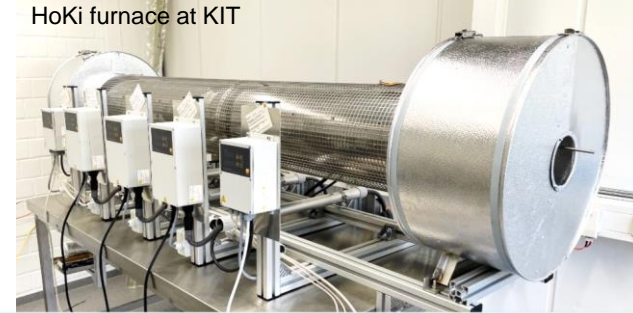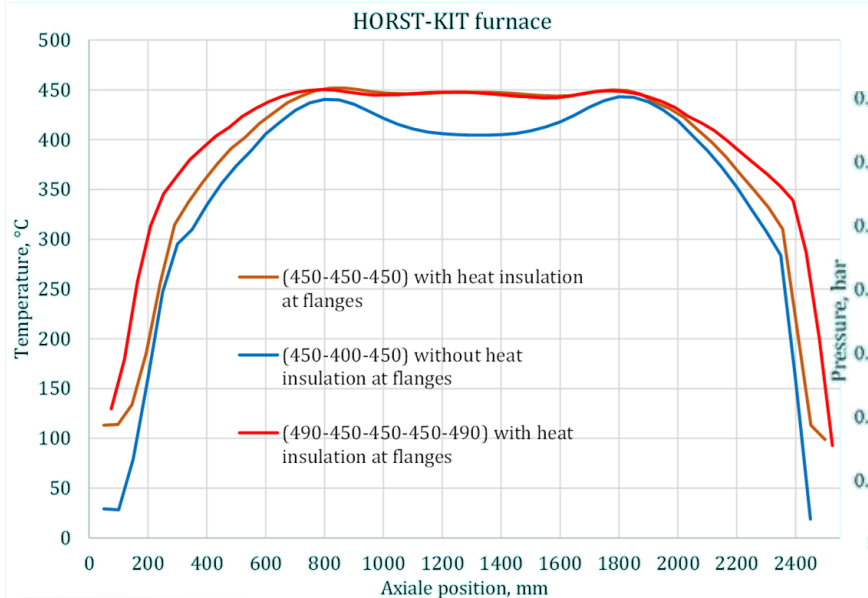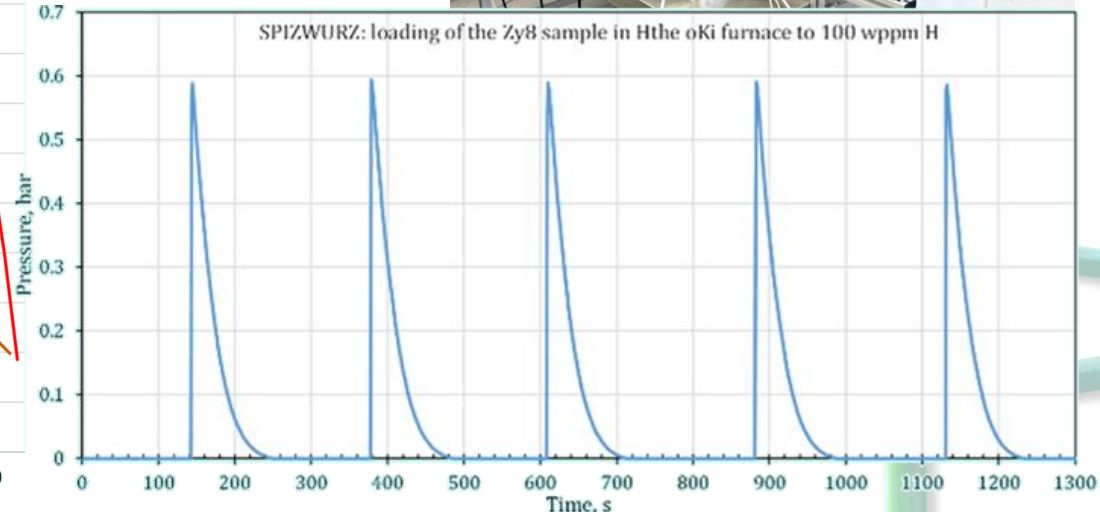

# Methods – Dry Storage Simulation

- 3 different cladding materials
- 2 different pressures

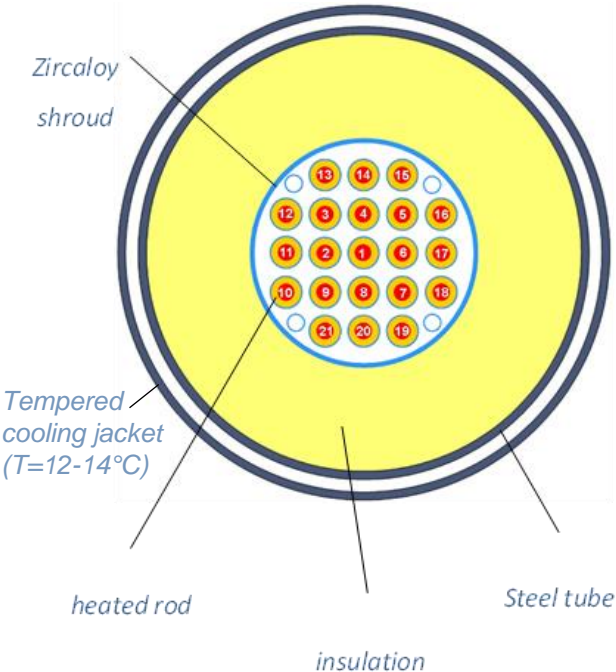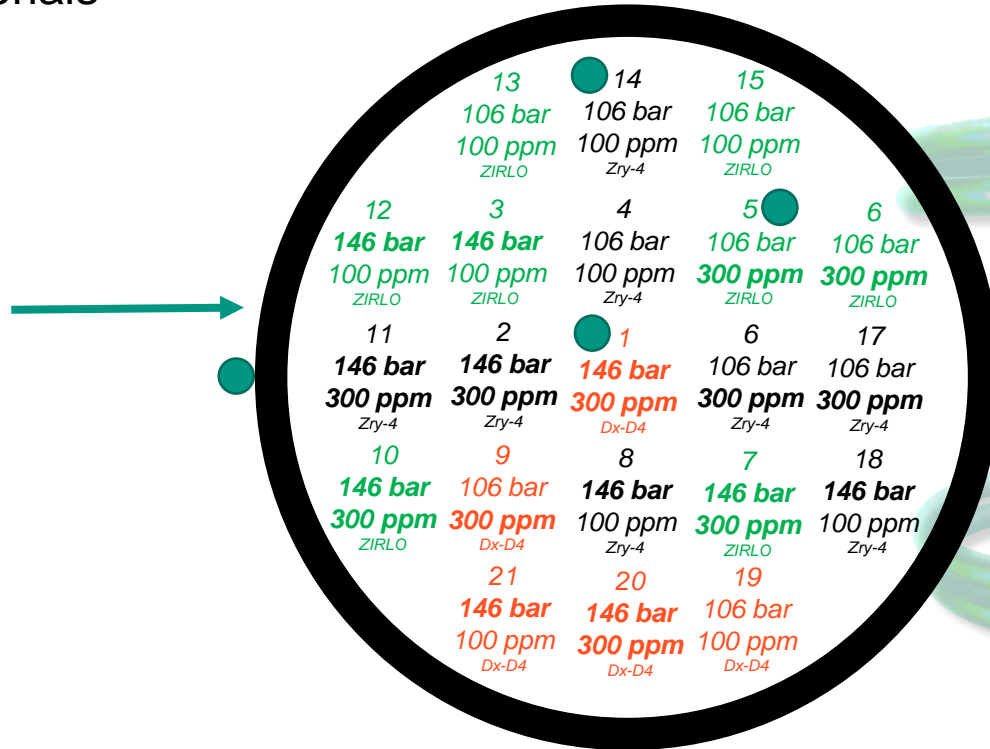

# Methods – Dry Storage Simulation

- Start-T: 400 °C (rod centre) - 100 °C (rod ends)
- Slow cooling: 7 K/w for 250 d
- Strain influences: thermal > plastic > cladding creep > elastic

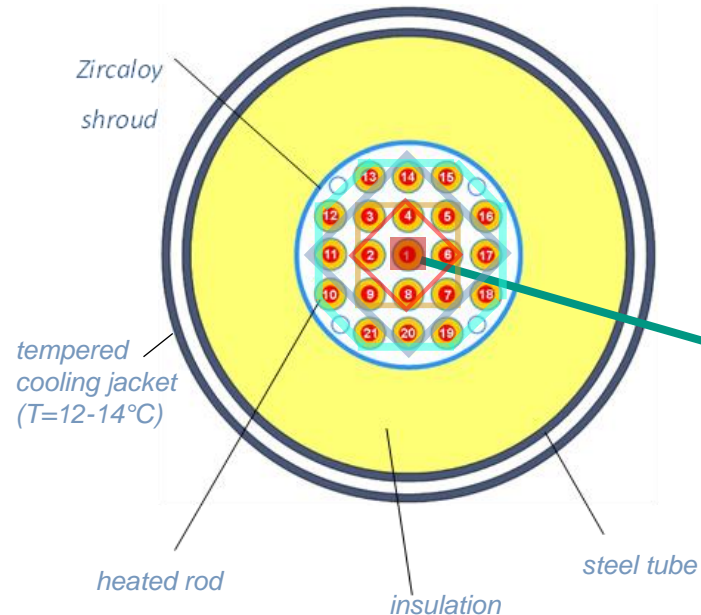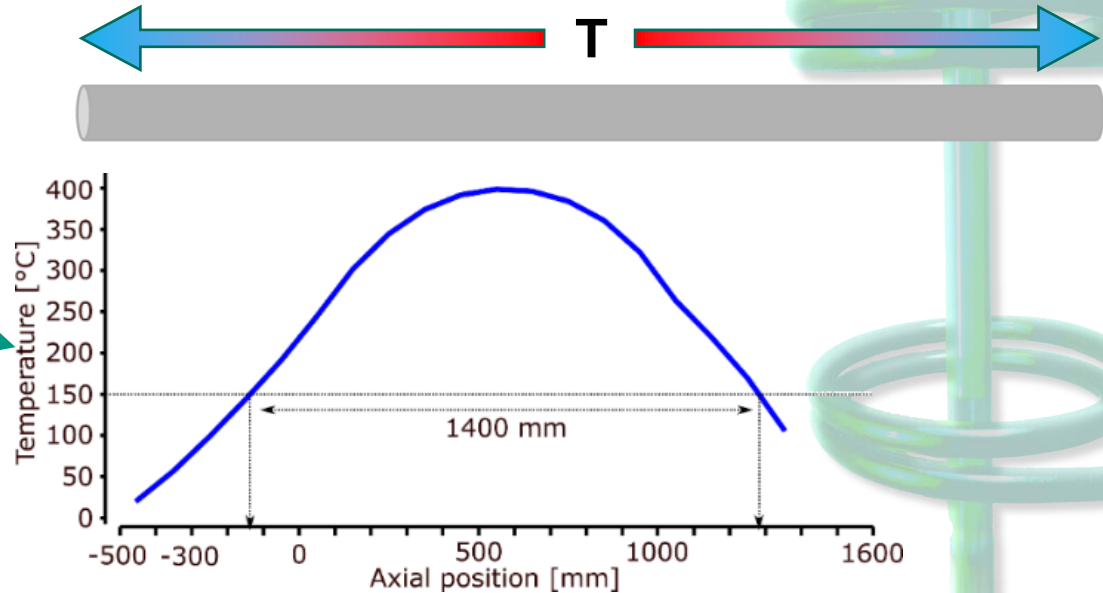



# Methods – Tensile Tests

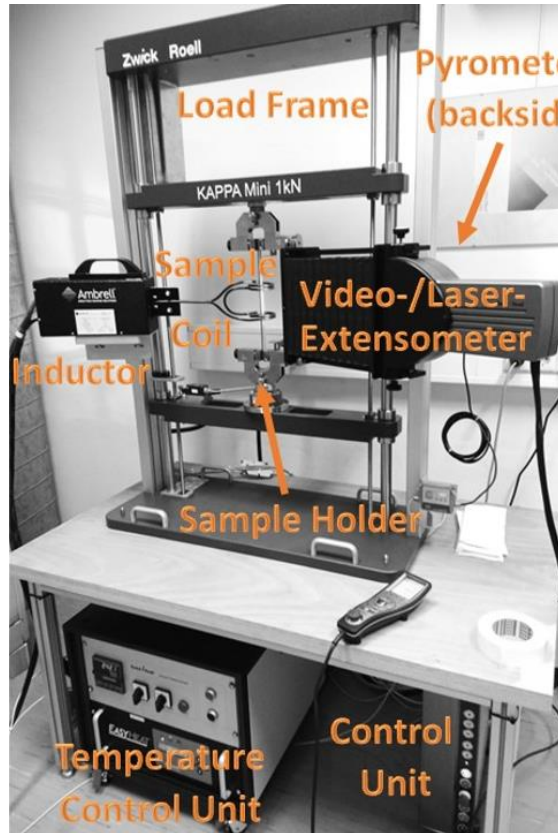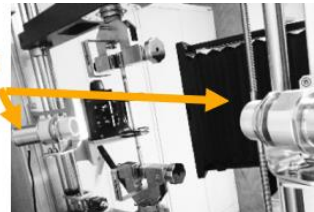

**INCHAMEL** = In-situ Neutron radiography CHamber with MEchanical Load

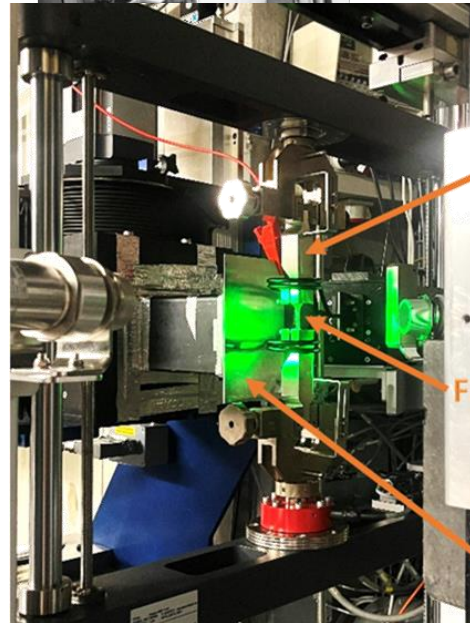

- Tensile tests
- Inductive heating
- Contactless strain & temperature measurements
- Transportabel -> external neutron beamlines
- Iron free components; no long-term neutron activation

# Analysis – Neutron Radiography

NR = Neutron Radiography

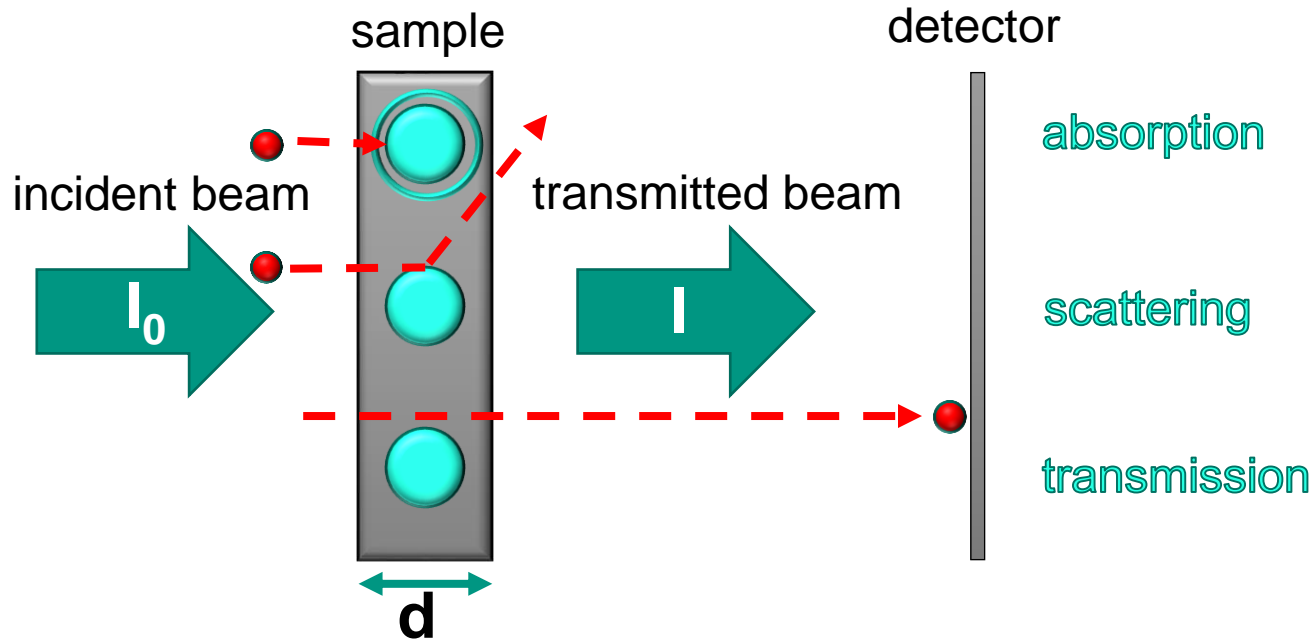

$$I = I_0 e^{-\sigma N d}$$

$$\Sigma = \sigma N$$

- I: intensity
- T: transmission
- $\sigma$ : microscopic neutron cross section
- N: number density
- d: sample thickness
- $\Sigma$ : macroscopic neutron cross section/  
neutron attenuation coefficient



# Analysis – Neutron Radiography

$$T = \frac{I}{I_0}$$

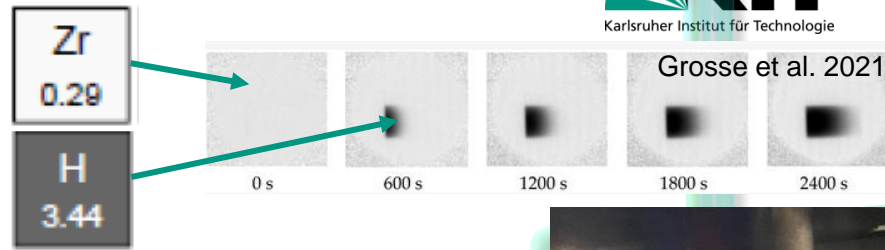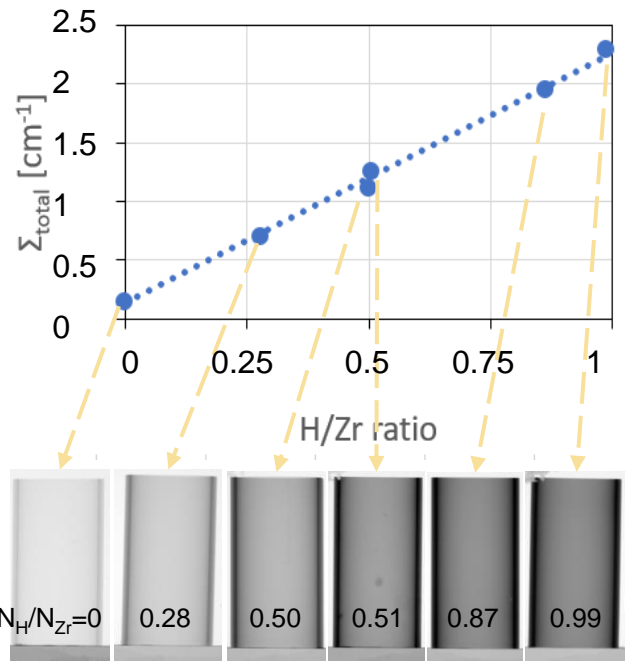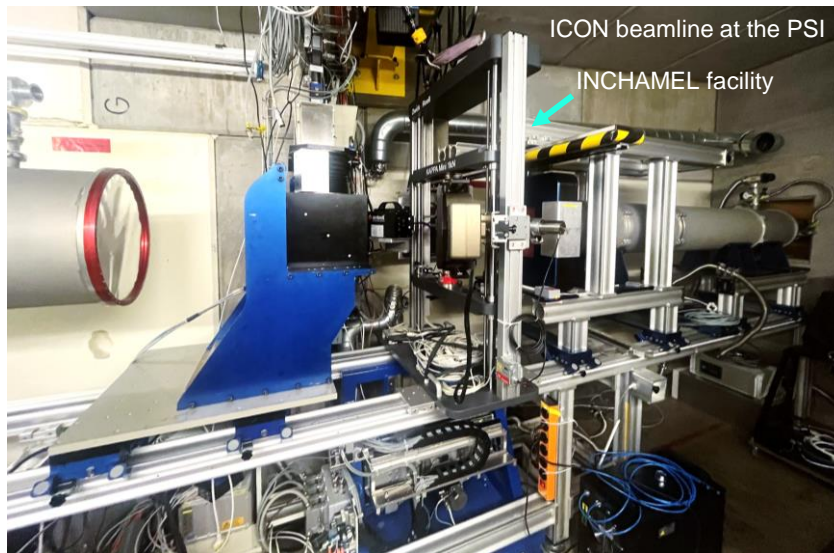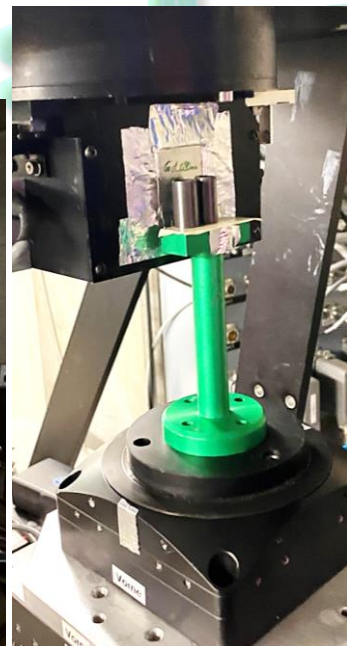



# Results – Diffusion coefficients

■ ZrH<sub>2</sub> powder, Ar, 400°C, 3h

$$c(x, t) = c_0 \left( 1 - \operatorname{erf} \left( \frac{x}{2\sqrt{Dt}} \right) \right) + c_i$$

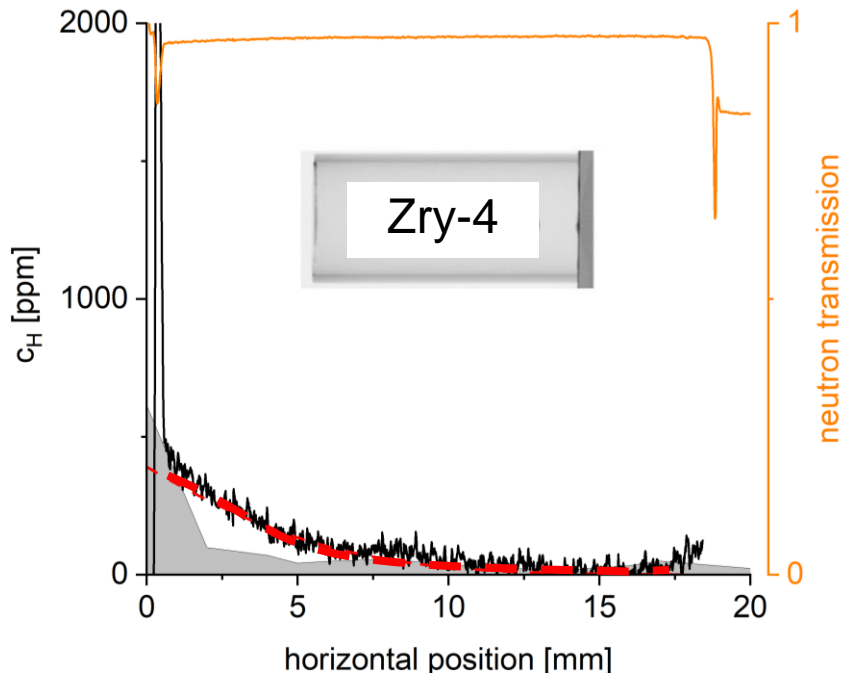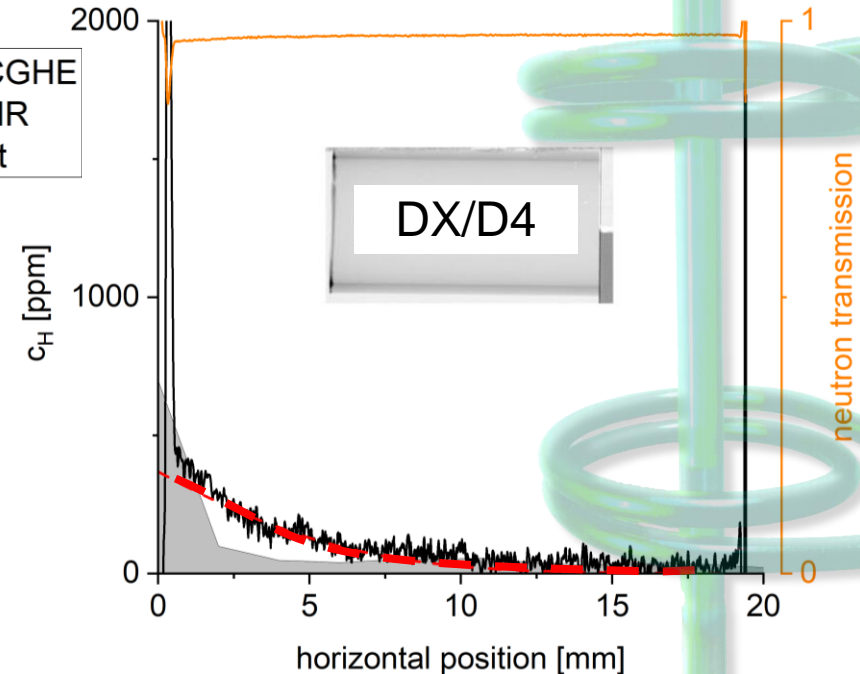

# Results – Tensile Tests

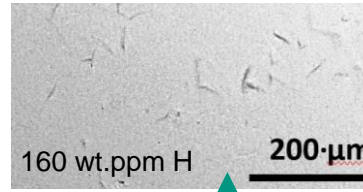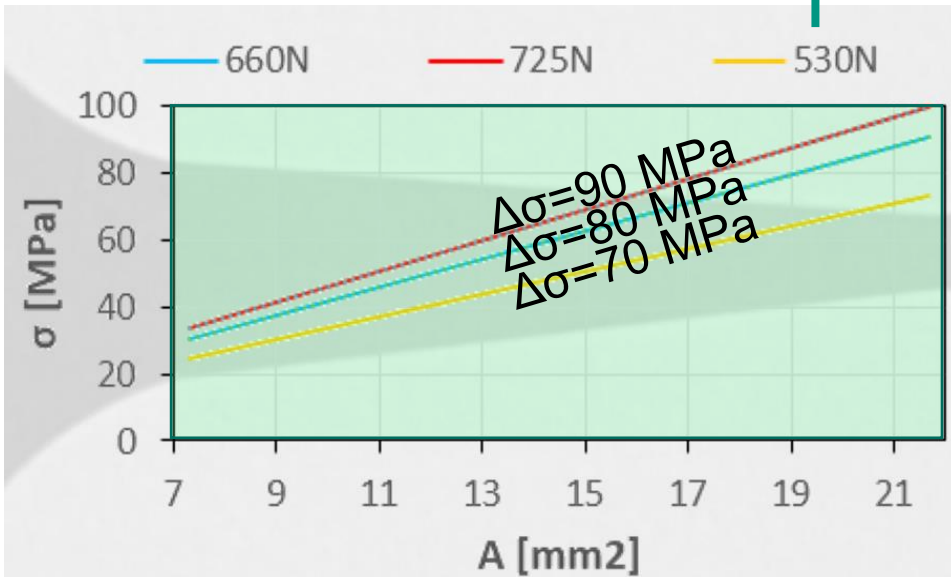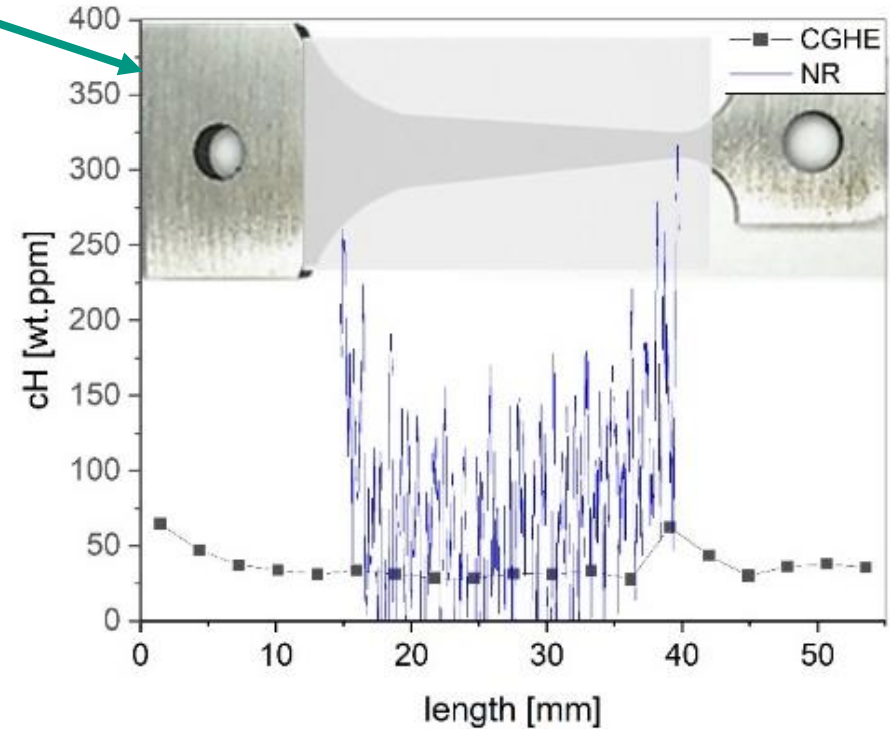

# Results – Tensile Tests

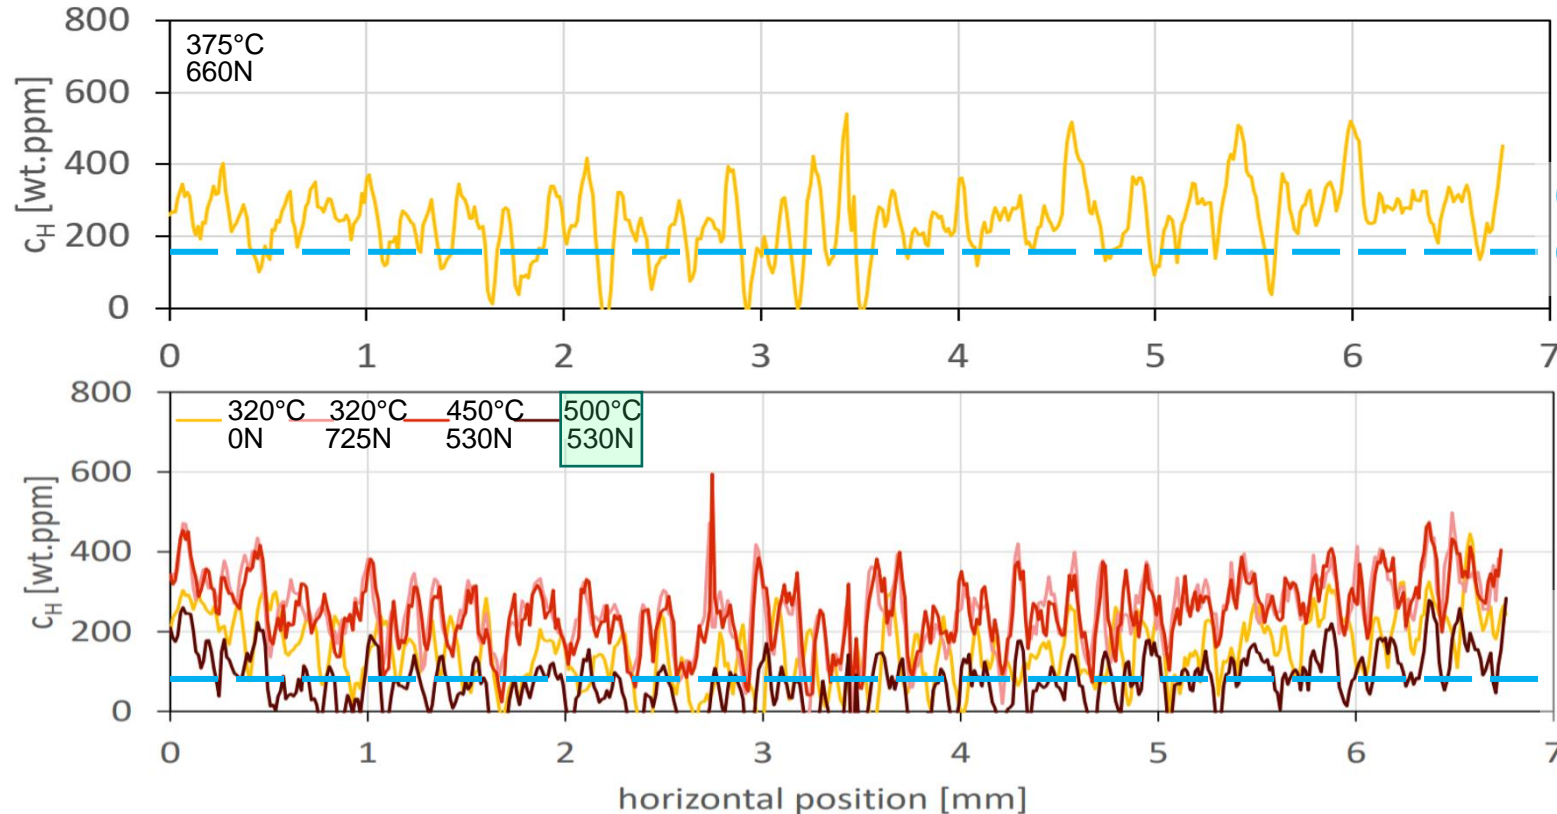

CGHE:  
 $c_H = 160$  wt.ppm

CGHE:  
 $c_H = 80$  wt.ppm

# Experimental investigations with neutron radiography of hydrogen effects by elastic stresses on cladding tubes under conditions similar to interim dry storage

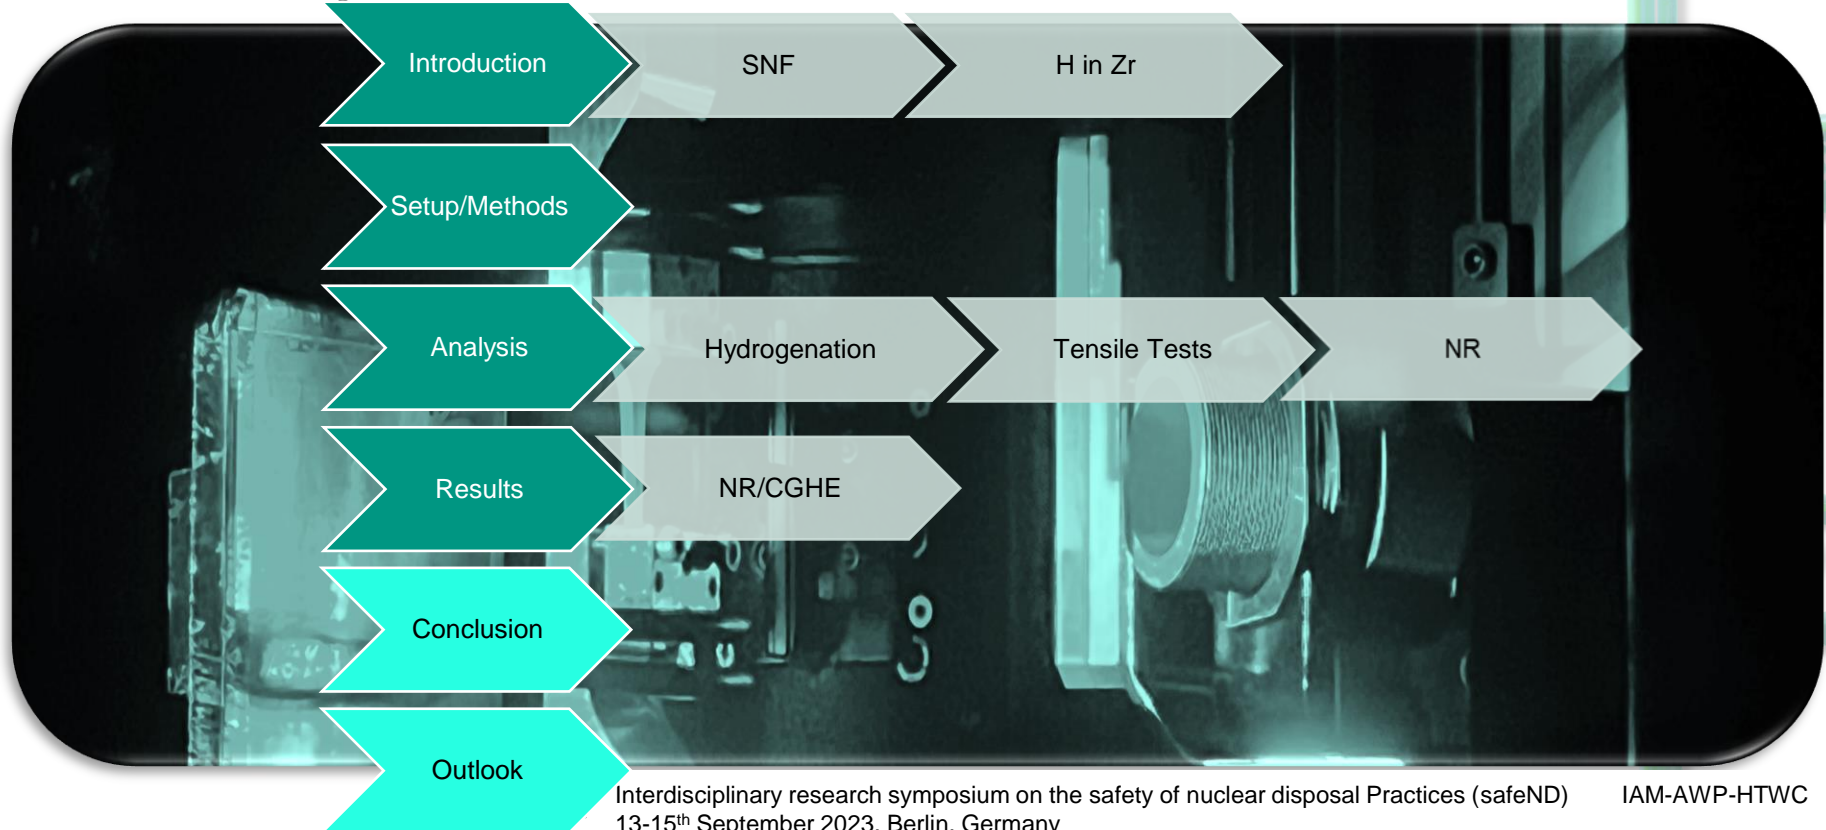



# Conclusion

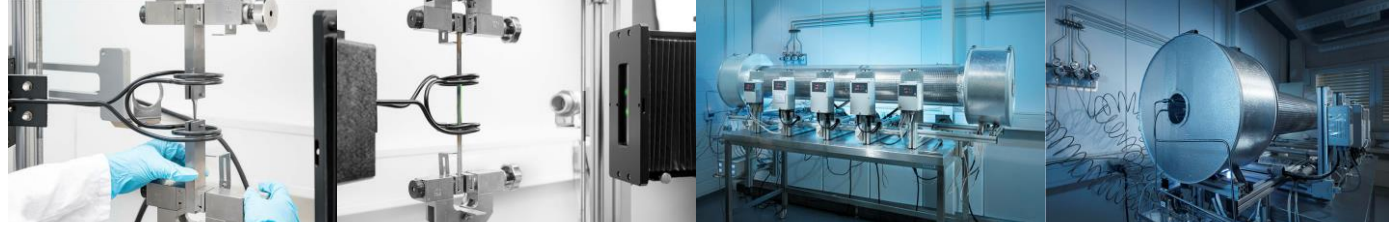

- How to determine hydrogen effects by elastic stresses on cladding tubes under conditions similar to interim dry storage?
  - With single effect experiments in combination with a tensile testing machine observed by NR (ex-/in-situ)
  - With a long-term experiment imitating the slow cooling process and dry storage relevant p-T-conditions
  - With modelling
  - With SNF samples (pellet-cladding interactions)

# Outlook

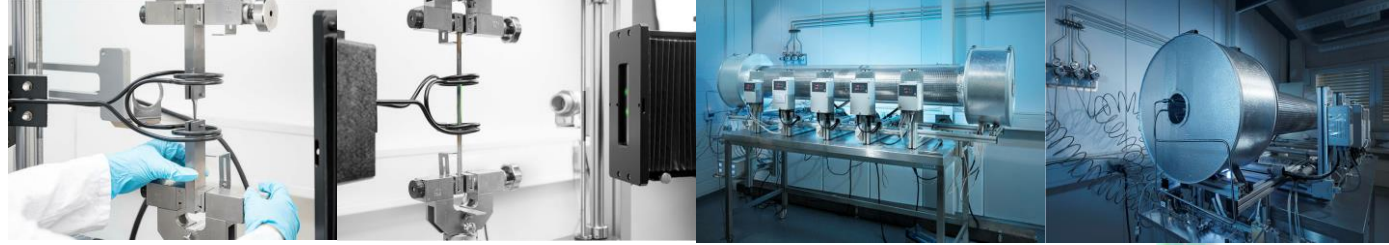

## ■ Single Effect Experiments

- NR ex-situ with the INCHAMEL facility for investigations of the stress influence on H diffusion and solubility in Zr for longer time scales (weeks)
- NR in-situ with the INCHAMEL facility for investigations of local stress induced hydrogen dissolution and precipitation processes

## ■ QUENCH bundle test

- NR ex-situ investigations of the simulation rods under the various p-T-conditions at the end of the test
- metallographic investigations of the hydride precipitation direction (stress influenced) at the end of the test

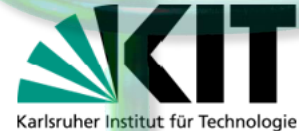

# Acknowledgements

- the SPIZWURZ project (FKZ 1501609B) is funded by the Federal Ministry for the Environment, Nature Conservation, Nuclear Safety and Consumer Protection (BMUV)
- the INCHAMEL facility was funded by the HOVER program of the Helmholtz Association
- PSI for providing beamtime & Anders Kaestner, David Mannes & Matteo Busi for their assistance during the measurements /analysis
- GRS team
- chemical analysis group of Thomas Bergfeldt (IAM-AWP)
- QUENCH team & colleagues at KIT

# Thank you!
